# Supplementary material
Source: PubMed Central journal article supplement (PMC4039573)
Supplement: NIHMS558991-supplement-02.pdf [file NIHMS558991-supplement-02.pdf]

## SUPPLEMENTARY TABLES

**Supplementary Table S1. Candidate genes, SNPs, SNP functions and predicted direction of association**

| Gene                        | SNP        | Function                | SIFT Prediction Using Orthologues, Homologues | Predicted Negatively Associated Allele (Previous Studies)                                                                                                                                                                                                                                                                                                                                                                                                                                                                                                    |
|-----------------------------|------------|-------------------------|-----------------------------------------------|--------------------------------------------------------------------------------------------------------------------------------------------------------------------------------------------------------------------------------------------------------------------------------------------------------------------------------------------------------------------------------------------------------------------------------------------------------------------------------------------------------------------------------------------------------------|
| Language and Speech (N = 9) |            |                         |                                               |                                                                                                                                                                                                                                                                                                                                                                                                                                                                                                                                                              |
| ATP2C2                      | rs2303853  | Gly411Ser               | Tolerated, Tolerated                          | NA                                                                                                                                                                                                                                                                                                                                                                                                                                                                                                                                                           |
| DCDC2                       | rs2274305  | Ser221Gly               | Tolerated, Tolerated                          | A allele (Ser). (A allele associated with dyslexia (Schumacher et al., 2006); No significant association with dyslexia (Cope et al., 2005, Zuo et al., 2012))                                                                                                                                                                                                                                                                                                                                                                                                |
| DYX1C1                      | rs600753   | Glu191Gly               | Tolerated, Tolerated                          | G allele (Gly). (G allele associated with dyslexia in females (Dahdouh et al., 2009))                                                                                                                                                                                                                                                                                                                                                                                                                                                                        |
| KIAA0319                    | rs807534   | Tyr424/968/1004/1013Cys | Tolerated, Tolerated                          | NA                                                                                                                                                                                                                                                                                                                                                                                                                                                                                                                                                           |
| KIAA0319                    | rs807541   | Ala309/853/889/898Ala   | Synonymous                                    | NA                                                                                                                                                                                                                                                                                                                                                                                                                                                                                                                                                           |
| KIAA0319                    | rs4576240  | Thr97/133/142/Pro       | Tolerated, Tolerated                          | No negatively associated allele reported. (Unassociated with dyslexia (Francks et al., 2004, Cope et al., 2005); unassociated with orthographic coding, phonological decoding ability, single-word reading ability, spelling ability and phonemic awareness (Dennis et al., 2009))                                                                                                                                                                                                                                                                           |
| NAGPA                       | rs887854   | Asn495Asn               | Synonymous                                    | NA                                                                                                                                                                                                                                                                                                                                                                                                                                                                                                                                                           |
| ZNF804A                     | rs1366842  | Thr707Lys               | Tolerated, Tolerated                          | NA                                                                                                                                                                                                                                                                                                                                                                                                                                                                                                                                                           |
| ZNF804A                     | rs12477430 | His747Arg               | Tolerated, Tolerated                          | NA                                                                                                                                                                                                                                                                                                                                                                                                                                                                                                                                                           |
| Episodic Memory (N = 14)    |            |                         |                                               |                                                                                                                                                                                                                                                                                                                                                                                                                                                                                                                                                              |
| ADCY8                       | rs12545028 | Arg523Arg               | Synonymous                                    | NA                                                                                                                                                                                                                                                                                                                                                                                                                                                                                                                                                           |
| BDNF                        | rs6265     | Val66/74/81/95/148Met   | Damaging, Damaging*                           | A allele (Met). (Negatively associated with declarative memory in meta-analysis (Kambeitz et al., 2012). Not associated with general cognitive ability, memory, executive functioning, visual tasks or cognitive fluency in meta-analysis (Mandelman and Grigorenko, 2012). Negatively associated with visual memory and positively associated with visio-spatial memory (Yogeetha et al., 2013). No association with performance on the Wisconsin Card Sorting Test or Trail Making Test in schizophrenia patients or healthy controls (Zhai et al., 2013)) |
| CAMK2G                      | rs2675671  | Lys49Lys                | Synonymous                                    | NA                                                                                                                                                                                                                                                                                                                                                                                                                                                                                                                                                           |

|                        |            |                                 |                         |                                                                                                                                                                                                                                                                                                                                                                                                                                                                                                                                                                 |
|------------------------|------------|---------------------------------|-------------------------|-----------------------------------------------------------------------------------------------------------------------------------------------------------------------------------------------------------------------------------------------------------------------------------------------------------------------------------------------------------------------------------------------------------------------------------------------------------------------------------------------------------------------------------------------------------------|
| CLSTN2                 | rs17348572 | Ile331Thr                       | Tolerated,<br>Tolerated | No negatively associated allele reported. (Not associated with performance on the Wisconsin Card Sorting Test (Zhang et al., 2009))                                                                                                                                                                                                                                                                                                                                                                                                                             |
| CLSTN2                 | rs7632885  | Val366Ile                       | Tolerated,<br>Tolerated | NA                                                                                                                                                                                                                                                                                                                                                                                                                                                                                                                                                              |
| CLSTN2                 | rs10804675 | Val847Val                       | Synonymous              | NA                                                                                                                                                                                                                                                                                                                                                                                                                                                                                                                                                              |
| COMT                   | rs4680     | Val158Met                       | Damaging,<br>Tolerated  | A allele (Met) <b>by SIFT only</b> . (Negative association of the Val allele with cognitive processing, working memory and encoding in meta-analysis (Mier, D et al., 2010). Negative association of the Val allele on phonological awareness and spelling (Landi et al., 2013). Negative association of the Val allele in males and positive association in females on verbal fluency (Soeiro-Desouza et al., 2013))                                                                                                                                           |
| GRIN2B                 | rs3026160  | Cys838Cys                       | Synonymous              | NA                                                                                                                                                                                                                                                                                                                                                                                                                                                                                                                                                              |
| HTR2A                  | rs6314     | His368/452Tyr                   | Tolerated,<br>Tolerated | T allele (Tyr). (Associated with long-term verbal memory, verbal delayed recall and recognition; not associated with immediate recall, attention or executive function (de Quervain et al., 2003, Wagner et al., 2008). Associated with working memory, attention, and inefficient prefrontal blood oxygen level-dependent functional MRI response during these tasks (Blasi et al. 2013). Not associated with the Moray House Test, Raven's Progressive Matrices, verbal fluency or logical memory in children or with cognitive ageing (Harris et al., 2007)) |
| HTR2A                  | rs6313     | Ser34Ser                        | Synonymous              | C allele (Ser). (Associated with spatial working memory in males (Gong et al., 2011). Not associated with the Moray House Test, Raven's Progressive Matrices, verbal fluency or logical memory in children or with cognitive ageing (Harris et al., 2007))                                                                                                                                                                                                                                                                                                      |
| WWC1<br>(KIBRA)        | rs17551608 | Arg250Cys                       | Damaging,<br>Damaging   | T allele (Cys) from SIFT results. No negatively associated allele reported.                                                                                                                                                                                                                                                                                                                                                                                                                                                                                     |
| WWC1<br>(KIBRA)        | rs3822659  | Ser735Ala                       | Tolerated,<br>Tolerated | T allele (Ser). (Associated with word fluency (Duning et al., 2013))                                                                                                                                                                                                                                                                                                                                                                                                                                                                                            |
| WWC1<br>(KIBRA)        | rs3733980  | Val801Val                       | Synonymous              | NA                                                                                                                                                                                                                                                                                                                                                                                                                                                                                                                                                              |
| WWC1<br>(KIBRA)        | rs3203960  | Leu1005/1011/Leu                | Synonymous              | NA                                                                                                                                                                                                                                                                                                                                                                                                                                                                                                                                                              |
| Verbal Fluency (N = 5) |            |                                 |                         |                                                                                                                                                                                                                                                                                                                                                                                                                                                                                                                                                                 |
| CACNA1C                | rs1544514  | Ala174Ala                       | Synonymous              | NA                                                                                                                                                                                                                                                                                                                                                                                                                                                                                                                                                              |
| DISC1                  | rs2492367  | Ile119/469/501Ile               | Synonymous              | NA                                                                                                                                                                                                                                                                                                                                                                                                                                                                                                                                                              |
| DISC1                  | rs6675281  | Leu485/607/639Phe,<br>Thr572Thr | Damaging,<br>Damaging   | T allele (Phe) from SIFT results. No negatively associated allele reported.                                                                                                                                                                                                                                                                                                                                                                                                                                                                                     |

|                           |            |                               |                         |                                                                                |
|---------------------------|------------|-------------------------------|-------------------------|--------------------------------------------------------------------------------|
| DISC1                     | rs12133766 | Leu499/621/653/Leu, 3'<br>UTR | Synonymous              | NA                                                                             |
| SLC6A3<br>(DAT)           | rs6350     | Asn38Asn                      | Synonymous              | NA                                                                             |
| Processing Speed (N = 11) |            |                               |                         |                                                                                |
| ATRNL1                    | rs10885721 | Thr1203Thr                    | Synonymous              | NA                                                                             |
| C20orf196                 | rs1699233  | Gly107Gly                     | Synonymous              | NA                                                                             |
| CRTC3                     | rs8033595  | Ser72Asn                      | Tolerated,<br>Damaging  | A allele (Asn) from SIFT results. No<br>negatively associated allele reported. |
| DIP2C                     | rs3740304  | Tyr1551Tyr                    | Synonymous              | NA                                                                             |
| DIP2C                     | rs2288681  | Ala1274Ala                    | Synonymous              | NA                                                                             |
| NFKBIL1                   | rs2230365  | Ser103/126/Ser                | Synonymous              | NA                                                                             |
| PDE1C                     | rs3213709  | Gly610/670/Gly                | Synonymous              | NA                                                                             |
| PDE1C                     | rs2302450  | Ala594/654Ala                 | Synonymous              | NA                                                                             |
| PDE1C                     | rs1860790  | Asn591/651Asn                 | Synonymous              | NA                                                                             |
| PKNOX1                    | rs234781   | Thr114Thr                     | Synonymous              | NA                                                                             |
| SPATA7                    | rs3179969  | Val42/74Met                   | Tolerated,<br>Tolerated | NA                                                                             |

**Supplementary Table S2. Means and Standard Deviations for Number of Valid Words and LSA-Derived Phenotypes by Group and Sex**

| Phenotype                  | Control Males (N = 142) | Control Females (N = 165) | Proband Males (N = 159) | Proband Females (N = 35) | Sibling Males (N = 66) | Sibling Females (N = 98) |
|----------------------------|-------------------------|---------------------------|-------------------------|--------------------------|------------------------|--------------------------|
| Number of Valid Words      | 22.28 (5.51)            | 21.72 (4.50)              | 15.82 (5.12)            | 17.51 (5.29)             | 22.11 (5.27)           | 20.47 (4.03)*            |
| Average Vector Length      | 0.060 (0.014)           | 0.064 (0.011)**           | 0.067 (0.20)            | 0.067 (0.018)            | 0.060 (0.013)          | 0.065 (0.011)**          |
| Overall Vector Length      | 0.50 (0.097)            | 0.52 (0.076)              | 0.43 (0.11)             | 0.47 (0.095)             | 0.50 (0.087)           | 0.50 (0.073)             |
| Cosine to 'Animal'         | 0.14 (0.028)            | 0.14 (0.030)              | 0.14 (0.042)            | 0.15 (0.041)             | 0.14 (0.025)           | 0.15 (0.030)*            |
| Average Cosine             | 0.094 (0.025)           | 0.098 (0.028)             | 0.10 (0.038)            | 0.11 (0.032)             | 0.097 (0.023)          | 0.10 (0.028)             |
| Cohesion (Window-Size = 1) | 0.19 (0.050)            | 0.18 (0.050)              | 0.18 (0.063)            | 0.18 (0.054)             | 0.19 (0.053)           | 0.19 (0.053)             |
| Cohesion (Window-Size = 2) | 0.12 (0.047)            | 0.12 (0.046)              | 0.12 (0.053)            | 0.12 (0.053)             | 0.13 (0.049)           | 0.12 (0.048)             |
| Cohesion (Window-Size = 3) | 0.10 (0.041)            | 0.10 (0.041)              | 0.10 (0.057)            | 0.10 (0.050)             | 0.11 (0.041)           | 0.10 (0.041)             |

\**p*-value < 0.05

**Supplementary Table S3. Correlations among LSA-derived variables and measures from the WMS and CVLT**

|                           | Number of valid words | Average cosine                   | Average vector length            | Overall vector length           | Cohesion (window size =1)       | Cohesion (window size =2)       | Cohesion (window size =3)       | WMS Logical memory 1           | WMS Logical memory 2            | Difference in WMS Logical memory 1 and 2 | CVLT 15 correct | CVLT long delay |
|---------------------------|-----------------------|----------------------------------|----------------------------------|---------------------------------|---------------------------------|---------------------------------|---------------------------------|--------------------------------|---------------------------------|------------------------------------------|-----------------|-----------------|
| Cosine to 'animal'        | -0.12 (0.010)         | <b>0.70</b> (<2.2e-16)           | <b>-0.17</b> ( <b>0.00033</b> )  | <b>-0.13</b> ( <b>0.00066</b> ) | <b>0.17</b> ( <b>0.00049</b> )  | <b>0.23</b> ( <b>8.06e-07</b> ) | <b>0.39</b> (<2.2e-16)          | -0.11 (0.020)                  | -0.12 (0.015)                   | 0.030 (0.53)                             | 0.0010 (0.98)   | -0.015 (0.76)   |
| Number of valid words     |                       | <b>-0.20</b> ( <b>2.28e-05</b> ) | <b>-0.33</b> ( <b>1.83e-12</b> ) | <b>0.56</b> (<2.2e-16)          | <b>0.24</b> ( <b>4.47e-07</b> ) | 0.13 (0.0063)                   | 0.099 (0.038)                   | <b>0.16</b> ( <b>0.00073</b> ) | <b>0.19</b> ( <b>6.96e-05</b> ) | -0.10 (0.030)                            | 0.069 (0.15)    | -0.10 (0.031)   |
| Average cosine            |                       |                                  | -0.043 (0.37)                    | 0.0068 (0.89)                   | <b>0.41</b> (<2.2e-16)          | <b>0.50</b> (<2.2e-16)          | <b>0.57</b> (<2.2e-16)          | -0.089 (0.062)                 | -0.12 (0.014)                   | 0.077 (0.11)                             | 0.042 (0.38)    | 0.030 (0.53)    |
| Average vector length     |                       |                                  |                                  | <b>0.52</b> (<2.2e-16)          | -0.090 (0.062)                  | <b>-0.17</b> ( <b>0.00027</b> ) | <b>-0.18</b> ( <b>0.00013</b> ) | -0.11 (0.018)                  | -0.10 (0.030)                   | -0.013 (0.78)                            | -0.059 (0.22)   | 0.061 (0.20)    |
| Overall vector length     |                       |                                  |                                  |                                 | <b>0.22</b> ( <b>2.46e-06</b> ) | 0.079 (0.097)                   | 0.067 (0.16)                    | 0.038 (0.43)                   | 0.062 (0.20)                    | -0.082 (0.086)                           | 0.0066 (0.89)   | -0.027 (0.58)   |
| Cohesion (window size =1) |                       |                                  |                                  |                                 |                                 | <b>0.55</b> (<2.2e-16)          | <b>0.36</b> ( <b>5.77e-15</b> ) | 0.011 (0.83)                   | -0.024 (0.61)                   | 0.064 (0.18)                             | 0.067 (0.16)    | 0.049 (0.31)    |
| Cohesion (window size =2) |                       |                                  |                                  |                                 |                                 |                                 | <b>0.57</b> (<2.2e-16)          | 0.050 (0.30)                   | 0.0092 (0.85)                   | 0.087 (0.070)                            | 0.094 (0.049)   | 0.0011 (0.98)   |
| Cohesion (window size =3) |                       |                                  |                                  |                                 |                                 |                                 |                                 | -0.034 (0.48)                  | -0.069 (0.15)                   | 0.086 (0.070)                            | 0.041 (0.39)    | 0.036 (0.45)    |

|                                                                  |  |  |  |  |  |  |  |  |                                       |                                     |                                    |                                    |
|------------------------------------------------------------------|--|--|--|--|--|--|--|--|---------------------------------------|-------------------------------------|------------------------------------|------------------------------------|
| size =3)                                                         |  |  |  |  |  |  |  |  |                                       |                                     |                                    |                                    |
| WMS<br>Logical<br>memory<br>1                                    |  |  |  |  |  |  |  |  | <b>0.91</b><br>( <b>&lt;2.2e-16</b> ) | 0.10<br>(0.031)                     | <b>0.21</b><br>( <b>1.14e-05</b> ) | <b>0.20</b> ( <b>1.73e-05</b> )    |
| WMS<br>Logical<br>memory<br>2                                    |  |  |  |  |  |  |  |  |                                       | <b>-0.30</b><br>( <b>1.18e-10</b> ) | <b>0.23</b><br>( <b>6.66e-07</b> ) | <b>0.20</b><br>( <b>1.52e-05</b> ) |
| Differen<br>ce<br>between<br>WMS<br>Logical<br>memory<br>1 and 2 |  |  |  |  |  |  |  |  |                                       |                                     | -0.11<br>(0.027)                   | -0.042<br>(0.38)                   |
| CVLT<br>15<br>correct                                            |  |  |  |  |  |  |  |  |                                       |                                     |                                    | <b>0.25</b><br>( <b>1.31e-07</b> ) |

Values are r (*p*-value). Bolded values are significant after Bonferroni correction for the number of tests (N=66).

## Supplementary References

- Blasi, G., De Virgillo, C., Papazacharias, A., Taurisano, P., Gelao, B., Fazio, L. et al. (2013). Converging evidence for the association of functional genetic variation in the serotonin receptor 2a gene with prefrontal function and olanzapine treatment. *JAMA Psychiatry*, *70*, 921-930.
- Cope, N., Harold, D., Hill, G., Moskvina, V., Stevenson, J., Holmans, P. et al. (2005). Strong evidence that KIAA0319 on chromosome 6p is a susceptibility gene for developmental dyslexia. *Am J Hum Genet*, *76*, 581-591.
- Dahdouh, F., Anthonia, H., Tapia-Páez, I., Peyrard-Janvid, M., Schulte-Körne, G., Warnke, A. et al. (2009). Further evidence for DYX1C1 as a susceptibility factor for dyslexia. *Psychiatr Genet*, *19*, 59-63.
- Dennis, M.Y., Paracchini, S., Scerri, T.S., Projunina-Olsson, L., Knight, J.C., Wade-Martins, R. et al. A common variant associated with dyslexia reduces expression of the KIAA0319 gene. *PLoS Genet*, *5*, e1000436.
- de Quervain, D.J., Henke, K., Aerni, A., Coluccia, D., Wollmer, M.A., Hock, C. et al. (2003). A functional genetic variation of the 5-HT<sub>2A</sub> receptor affects human memory. *Nat Neurosci*, *6*, 1141-1142.
- Duning, K., Wennmann, D.O., Bokemeyer, A., Reissner, C., Wersching, H., Thomas, C. et al. (2013). Common exonic missense variants in the C2 domain of the human KIBRA protein modify lipid binding and cognitive performance. *Transl Psychiatry*, *18*, e272.
- Francks, C., Paracchini, S., Smith, S.D., Richardson, A.J., Scerri, T.S., Cardon, L.R. et al. (2004). A 77-kilobase region of chromosome 6p22.2 is associated with dyslexia in families from the United Kingdom and from the United States. *Am J Hum Genet*, *75*, 1046-1058.
- Gong, P., Li, J., Wang, J., Lei, X., Chen, D., Zhang, K. et al. (2011). Variations in 5-HT<sub>2A</sub> influence spatial cognitive abilities and working memory. *Can J Neurol Sci*, *38*, 303-308.
- Harris, S.E., Fox, H., Wright, A.F., Hayward, C., Starr, J.M., Whalley, L.J. et al. (2007). A genetic association analysis of cognitive ability and cognitive ageing using 325 markers for 109 genes associated with oxidative stress or cognition. *BMC Genet*, *8*, 43.
- Kambeitz, J.P., Bhattacharyya, S., Kambeitz-Ilanovic, L.M., Valli, I., Collier, D.A., McGuire, P. (2012). Effect of BDNF val(66)met polymorphism on declarative memory and its neural substrate: a meta-analysis. *Neurosci Biobehav Rev*, *36*, 2165-2177.
- Kumar, P., Henikoff, S., Ng, P.C. (2009). Predicting the effects of coding non-synonymous variants on protein function using the SIFT algorithm. *Nat Protoc*, *4*, 1073-1081.
- Landi, N., Frost, S.J., Mencl, W.E., Preston, J.L., Jacobsen, L.K., Lee, M. et al. (2013). The COMT Val/Met polymorphism is associated with reading-related skills and consistent patterns of functional neural activation. *Dev Sci*, *16*, 13-23.

Mandelman, S.D., Grigorenko, E.L. (2012). BDNF Val66Met and cognition: all, none, or some? A meta-analysis of the genetic association. *Genes Brain Behav*, *11*, 127-136.

Mier, D., Kirsch, P., Meyer-Lindenberg, A. (2010). Neural substrates of pleiotropic action of genetic variation in *COMT*: a meta-analysis. *Mol Psychiatr*, *15*, 918-927.

Schumacher, J., Anthoni, H., Dahdouh, F., König, I.R., Hillmer, A.M., Kluck, N. et al. (2006). Strong genetic evidence of DCDC2 as a susceptibility gene for dyslexia. *Am J Hum Genet*, *78*, 52-62.

Soeiro-De-Souza, M.G., Bio, D.S., David, D.P., Missio, G., Lima, B., Fernandes, F. et al. (2013). Gender effects of the COMT Val 158 Met genotype on verbal fluency in healthy adults. *Mol Med Rep*, *8*, 837-844.

Wagner, M., Schuhmacher, A., Schwab, S., Zobel, A., Maier, W. (2008). The His452Tyr variant of the gene encoding the 5-HT<sub>2A</sub> receptor is specifically associated with consolidation of episodic memory in humans. *Int J Neuropsychopharmacol*, *11*, 1163-1167.

Yogeetha, B.S., Haupt, L.M., McKenzie, K., Sutherland, H.G., Okolicsyani, R.K., Lea, R.A. et al. (2013). BDNF and TNF- $\alpha$  polymorphisms in memory. *Mol Biol Rep*, *40*, 5483-5490.

Zhai, J., Yu, Q., Chen, M., Gao, Y., Zhang, Q., Li, J. et al. (2013). Association of the brain-derived neurotrophic factor gene G196A rs6265 polymorphisms and the cognitive function and clinical symptoms of schizophrenia. *Int J Clin Exp Pathol*, *6*, 1617-1623.

Zhang, H., Kranzler, H.R., Poling, J., Gruen, J.R., Gelernter, J. (2009). Cognitive flexibility is associated with KIBRA variant and modulated by recent tobacco use. *Neuropsychopharmacology*, *34*, 2508-2516..

Zuo, P.X., Wu, H.R., Li, Z.C., Cao, X.D., Pang, L.J., Yang, L., et al. (2012). Association of polymorphisms in the DCDC2 gene with developmental dyslexia in the Han Chinese. *Chin Med J (Engl)*, *125*, 622-625.
